# Supplementary material
Source: MDPI journal article supplement (https://www.mdpi.com/2073-4468/13/1/6)
Supplement: s1 [file s1]

**Supplementary Table S1:** Repeatability performances, estimated using 6 samples

| Sample number | Experimental set-up                                        | Mean value (kAU/L) | Repeatability precision (%) |
|---------------|------------------------------------------------------------|--------------------|-----------------------------|
| 1             | Five repetition, randomly pipetted in one plate            | 1.61               | 5.5                         |
| 2             | Five repetition, randomly pipetted in one plate            | 3.77               | 3.9                         |
| 3             | Five repetition, randomly pipetted in one plate            | 5.96               | 5.99                        |
| 4             | Five repetition, randomly pipetted in one plate            | 7.42               | 23.6                        |
| 5             | Five repetition, randomly pipetted in one plate            | 10.1               | 15.90                       |
| 6             | Twenty-five repetitions in different plates (5 each plate) | 2.01               | 20.9                        |
